# Supplementary material for: SARS-CoV-2 lineage B.1.1.7 is associated with greater disease severity among hospitalised women but not men
Source: bioRxiv or medRxiv preprint supplement (doi:10.1101/2021.06.24.21259107), 2021-06-28

**Supplementary Table 1** Hazard ratios for the outcomes of mortality and intensive therapy unit admission associated with lineage B.1.1.7 from mixed effects Cox models, with sensitivity analyses limited to hospital-onset COVID-19 infection (HOCl) and non-HOCl cases.

|                      | Overall effect of lineage B.1.1.7 | Interaction by sex                 |                                      |
|----------------------|-----------------------------------|------------------------------------|--------------------------------------|
|                      |                                   | Effect of lineage B.1.1.7 in males | Effect of lineage B.1.1.7 in females |
| <i>Mortality</i>     |                                   |                                    |                                      |
| All inpatients       | 1.01 (0.79 to 1.28)               | 0.82 (0.61 to 1.10)                | 1.30 (0.95 to 1.78)                  |
| Excluding HOCl cases | 1.2 (0.86 to 1.69)                | 0.94 (0.63 to 1.4)                 | 1.64 (1.06 to 2.52)                  |
| Only HOCl cases      | 0.83 (0.55 to 1.23)               | 0.72 (0.43 to 1.19)                | 0.97 (0.57 to 1.63)                  |
| <i>ITU admission</i> |                                   |                                    |                                      |
| All inpatients       | 1.01 (0.75 to 1.37)               | 0.74 (0.52 to 1.04)                | 1.82 (1.15 to 2.90)                  |
| Excluding HOCl cases | 0.88 (0.62 to 1.24)               | 0.66 (0.45 to 0.97)                | 1.53 (0.92 to 2.57)                  |
| Only HOCl cases      | 0.96 (0.42 to 2.18)               | 0.74 (0.27 to 2.02)                | 1.42 (0.42 to 4.77)                  |

Results shown as hazard ratio (95% CI).

**Table S2** Proportion of SARS-CoV-2 due to lineage B.1.1.7 for all male inpatient sequenced samples according to patient characteristics

|                                | Lineage B.1.1.7<br>(n=573) | Not lineage B.1.1.7<br>(n=610) | Total (n=1183)    |
|--------------------------------|----------------------------|--------------------------------|-------------------|
| <b>Age Group</b>               |                            |                                |                   |
| 0-11                           | 12 (75)                    | 4 (25)                         | 16 (100)          |
| 12-24                          | 9 (52.9)                   | 8 (47.1)                       | 17 (100)          |
| 25-34                          | 27 (65.9)                  | 14 (34.1)                      | 41 (100)          |
| 35-49                          | 82 (53.9)                  | 70 (46.1)                      | 152 (100)         |
| 50-69                          | 213 (54.1)                 | 181 (45.9)                     | 394 (100)         |
| 70-79                          | 107 (41.8)                 | 149 (58.2)                     | 256 (100)         |
| 80+                            | 123 (40.1)                 | 184 (59.9)                     | 307 (100)         |
| <b>Sex</b>                     |                            |                                |                   |
| Female                         | 0 (NaN)                    | 0 (NaN)                        | 0 (NaN)           |
| Male                           | 573 (48.4)                 | 610 (51.6)                     | 1183 (100)        |
| <b>Sample week starting:</b>   |                            |                                |                   |
| 16/11/2020                     | 9 (10.5)                   | 77 (89.5)                      | 86 (100)          |
| 23/11/2020                     | 12 (10.3)                  | 105 (89.7)                     | 117 (100)         |
| 30/11/2020                     | 31 (24.2)                  | 97 (75.8)                      | 128 (100)         |
| 07/12/2020                     | 23 (26.4)                  | 64 (73.6)                      | 87 (100)          |
| 14/12/2020                     | 71 (45.5)                  | 85 (54.5)                      | 156 (100)         |
| 21/12/2020                     | 117 (57.4)                 | 87 (42.6)                      | 204 (100)         |
| 28/12/2020                     | 197 (75.5)                 | 64 (24.5)                      | 261 (100)         |
| 04/01/2021                     | 113 (78.5)                 | 31 (21.5)                      | 144 (100)         |
| <b>Patient Class</b>           |                            |                                |                   |
| HCW                            | 1 (33.3)                   | 2 (66.7)                       | 3 (100)           |
| CAI*                           | 439 (55.6)                 | 351 (44.4)                     | 790 (100)         |
| Indeterminate HCAI†            | 29 (28.7)                  | 72 (71.3)                      | 101 (100)         |
| Probable/definite HCAI‡        | 104 (36)                   | 185 (64)                       | 289 (100)         |
| <b>Region</b>                  |                            |                                |                   |
| Glasgow                        | 40 (30.5)                  | 91 (69.5)                      | 131 (100)         |
| Hampshire                      | 39 (57.4)                  | 29 (42.6)                      | 68 (100)          |
| London                         | 459 (64.3)                 | 255 (35.7)                     | 714 (100)         |
| South Yorkshire                | 35 (13)                    | 235 (87)                       | 270 (100)         |
| <b>Ethnicity</b>               |                            |                                |                   |
| White                          | 244 (37.7)                 | 403 (62.3)                     | 647 (100)         |
| Black                          | 101 (54)                   | 86 (46)                        | 187 (100)         |
| Asian                          | 62 (72.1)                  | 24 (27.9)                      | 86 (100)          |
| Mixed or other                 | 105 (68.6)                 | 48 (31.4)                      | 153 (100)         |
| Unknown                        | 61 (55.5)                  | 49 (44.5)                      | 110 (100)         |
| <b>Patient characteristics</b> |                            |                                |                   |
| Obese (BMI>=35)                | 47 (52.2) [N=573]          | 43 (47.8) [N=610]              | 90 (100) [N=1183] |
| Pregnant                       | NA                         | NA                             | NA                |
| Care home resident             | 21 (41.2) [N=573]          | 30 (58.8) [N=609]              | 51 (100) [N=1182] |

|                                               |                    |                    |                    |
|-----------------------------------------------|--------------------|--------------------|--------------------|
| <b>Comorbidities</b>                          |                    |                    |                    |
| None                                          | 181 (58)           | 131 (42)           | 312 (100)          |
| One                                           | 153 (48)           | 166 (52)           | 319 (100)          |
| Two                                           | 129 (46.9)         | 146 (53.1)         | 275 (100)          |
| Three or more                                 | 110 (39.7)         | 167 (60.3)         | 277 (100)          |
| Not recorded                                  | 0 (NA)             | 0 (NA)             | 0 (NA)             |
| <b>Died within 28d</b>                        | 112 (38.4) [N=572] | 180 (61.2) [N=608] | 292 (100) [N=1180] |
| <b>Admitted to ITU within 28d<sup>†</sup></b> | 121 (58.5) [N=554] | 86 (41.5) [N=595]  | 207 (100) [N=1149] |

Data shown as *n* (%), with [N] with available data shown where missing values possible.

\*Diagnosed at or  $\leq$ 2 days from admission. †Diagnosed 3-7 days from admission. ‡Diagnosed  $\geq$ 8 days from admission. ††Excluding patients admitted to ITU prior to SARS-CoV-2 diagnosis. CAI, community-acquired infection; HCAI, healthcare-associated infection; HCW, healthcare worker; ITU, intensive therapy unit.

**Table S3** Proportion of SARS-CoV-2 due to lineage B.1.1.7 for all female inpatient sequenced samples according to patient characteristics

|                                | Lineage B.1.1.7<br>(n=534) | Not lineage B.1.1.7<br>(n=624) | Total (n=1158)     |
|--------------------------------|----------------------------|--------------------------------|--------------------|
| <b>Age Group</b>               |                            |                                |                    |
| 0-11                           | 3 (37.5)                   | 5 (62.5)                       | 8 (100)            |
| 12-24                          | 11 (64.7)                  | 6 (35.3)                       | 17 (100)           |
| 25-34                          | 34 (60.7)                  | 22 (39.3)                      | 56 (100)           |
| 35-49                          | 77 (58.8)                  | 54 (41.2)                      | 131 (100)          |
| 50-69                          | 158 (52.1)                 | 145 (47.9)                     | 303 (100)          |
| 70-79                          | 101 (42.6)                 | 136 (57.4)                     | 237 (100)          |
| 80+                            | 150 (36.9)                 | 256 (63.1)                     | 406 (100)          |
| <b>Sex</b>                     |                            |                                |                    |
| Female                         | 534 (46.1)                 | 624 (53.9)                     | 1158 (100)         |
| Male                           | 0 (NaN)                    | 0 (NaN)                        | 0 (NaN)            |
| <b>Sample week starting:</b>   |                            |                                |                    |
| 16/11/2020                     | 6 (6.5)                    | 87 (93.5)                      | 93 (100)           |
| 23/11/2020                     | 14 (13.1)                  | 93 (86.9)                      | 107 (100)          |
| 30/11/2020                     | 28 (24.1)                  | 88 (75.9)                      | 116 (100)          |
| 07/12/2020                     | 32 (27.1)                  | 86 (72.9)                      | 118 (100)          |
| 14/12/2020                     | 67 (42.1)                  | 92 (57.9)                      | 159 (100)          |
| 21/12/2020                     | 103 (51.8)                 | 96 (48.2)                      | 199 (100)          |
| 28/12/2020                     | 164 (74.9)                 | 55 (25.1)                      | 219 (100)          |
| 04/01/2021                     | 120 (81.6)                 | 27 (18.4)                      | 147 (100)          |
| <b>Patient Class</b>           |                            |                                |                    |
| HCW                            | 6 (37.5)                   | 10 (62.5)                      | 16 (100)           |
| CAI*                           | 408 (54.7)                 | 338 (45.3)                     | 746 (100)          |
| Indeterminate HCAI†            | 25 (22.3)                  | 87 (77.7)                      | 112 (100)          |
| Probable/definite HCAI‡        | 95 (33.5)                  | 189 (66.5)                     | 284 (100)          |
| <b>Region</b>                  |                            |                                |                    |
| Glasgow                        | 51 (32.5)                  | 106 (67.5)                     | 157 (100)          |
| Hampshire                      | 35 (63.6)                  | 20 (36.4)                      | 55 (100)           |
| London                         | 412 (67.3)                 | 200 (32.7)                     | 612 (100)          |
| South Yorkshire                | 36 (10.8)                  | 298 (89.2)                     | 334 (100)          |
| <b>Ethnicity</b>               |                            |                                |                    |
| White                          | 296 (41)                   | 426 (59)                       | 722 (100)          |
| Black                          | 73 (52.5)                  | 66 (47.5)                      | 139 (100)          |
| Asian                          | 56 (55.4)                  | 45 (44.6)                      | 101 (100)          |
| Mixed or other                 | 81 (65.3)                  | 43 (34.7)                      | 124 (100)          |
| Unknown                        | 28 (38.9)                  | 44 (61.1)                      | 72 (100)           |
| <b>Patient characteristics</b> |                            |                                |                    |
| Obese (BMI>=35)                | 75 (50.3) [N=534]          | 74 (49.7) [N=624]              | 149 (100) [N=1158] |
| Pregnant                       | 25 (55.6) [N=530]          | 20 (44.4) [N=624]              | 45 (100) [N=1154]  |
| Care home resident             | 24 (32.9) [N=534]          | 49 (67.1) [N=623]              | 73 (100) [N=1157]  |

|                                               |                    |                    |                    |
|-----------------------------------------------|--------------------|--------------------|--------------------|
| <b>Comorbidities</b>                          |                    |                    |                    |
| None                                          | 156 (55.1)         | 127 (44.9)         | 283 (100)          |
| One                                           | 154 (46.7)         | 176 (53.3)         | 330 (100)          |
| Two                                           | 132 (44.9)         | 162 (55.1)         | 294 (100)          |
| Three or more                                 | 92 (36.9)          | 157 (63.1)         | 249 (100)          |
| Not recorded                                  | 0 (NA)             | 2 (100)            | 2 (100)            |
| <b>Died within 28d</b>                        | 105 (44.7) [N=534] | 130 (55.3) [N=622] | 235 (100) [N=1156] |
| <b>Admitted to ITU within 28d<sup>†</sup></b> | 99 (76.2) [N=527]  | 31 (23.8) [N=619]  | 130 (100) [N=1146] |

Data shown as *n* (%), with [N] with available data shown where missing values possible.

\*Diagnosed at or  $\leq 2$  days from admission. †Diagnosed 3-7 days from admission. ‡Diagnosed  $\geq 8$  days from admission. ††Excluding patients admitted to ITU prior to SARS-CoV-2 diagnosis. CAI, community-acquired infection; HCAI, healthcare-associated infection; HCW, healthcare worker; ITU, intensive therapy unit.

**Figure S1** Bar plot of the proportion of inpatient samples sent for sequencing that sequenced successfully for 6/8 hospitals from which data are available. The proportion of successfully sequenced samples was not different between weeks (chi-squared,  $p = 0.97$ ).

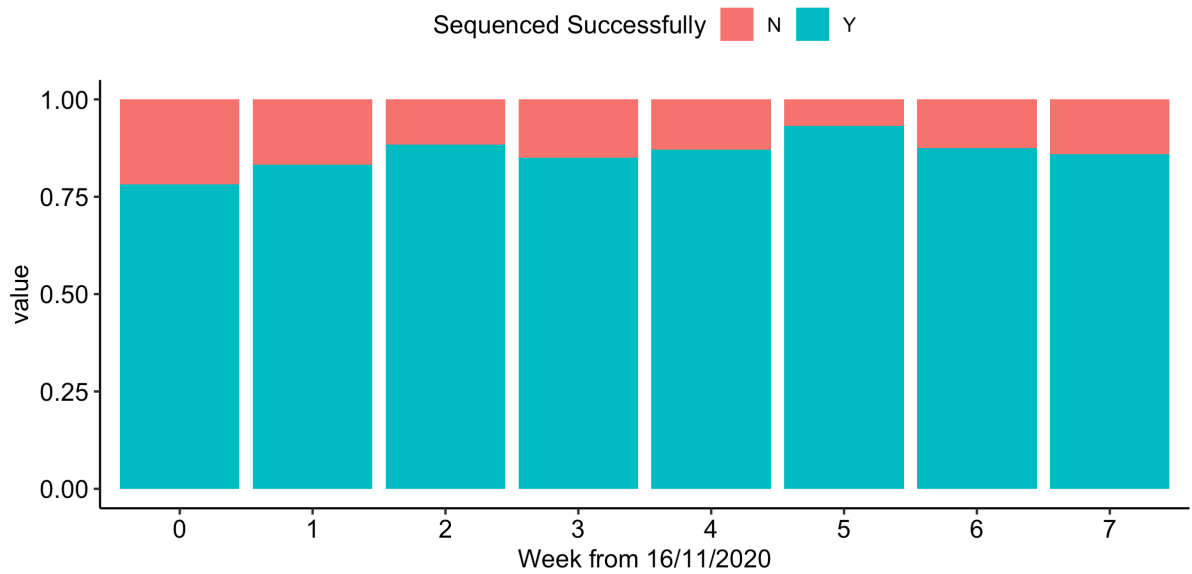

**Figure S2** Sequence counts by region, week of sample and patient type.

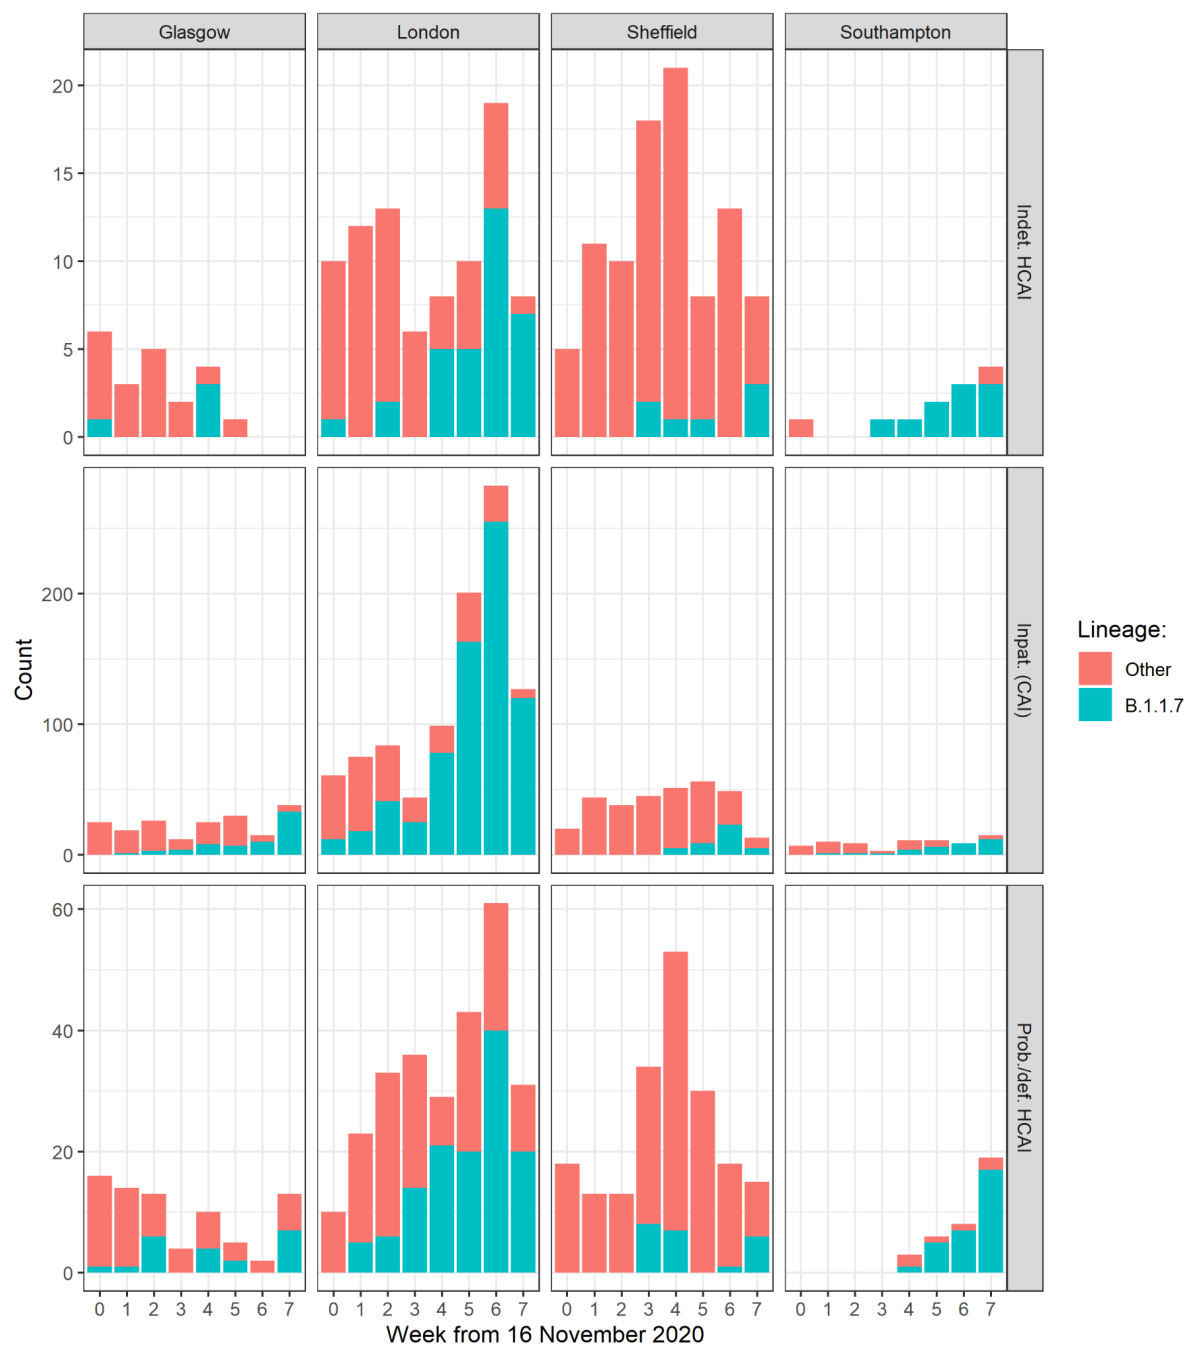

CAI, community-acquired infection; HCAI, healthcare-associated infection.

**Figure S3** Kaplan-Meier plots of all-cause mortality among all inpatients admitted with SARS-CoV-2 in relation to lineage B.1.1.7 status, plotted according to patient sex and age categories. Naïve 95% CIs are plotted for illustrative purposes (these are not derived from the multilevel Cox models described).

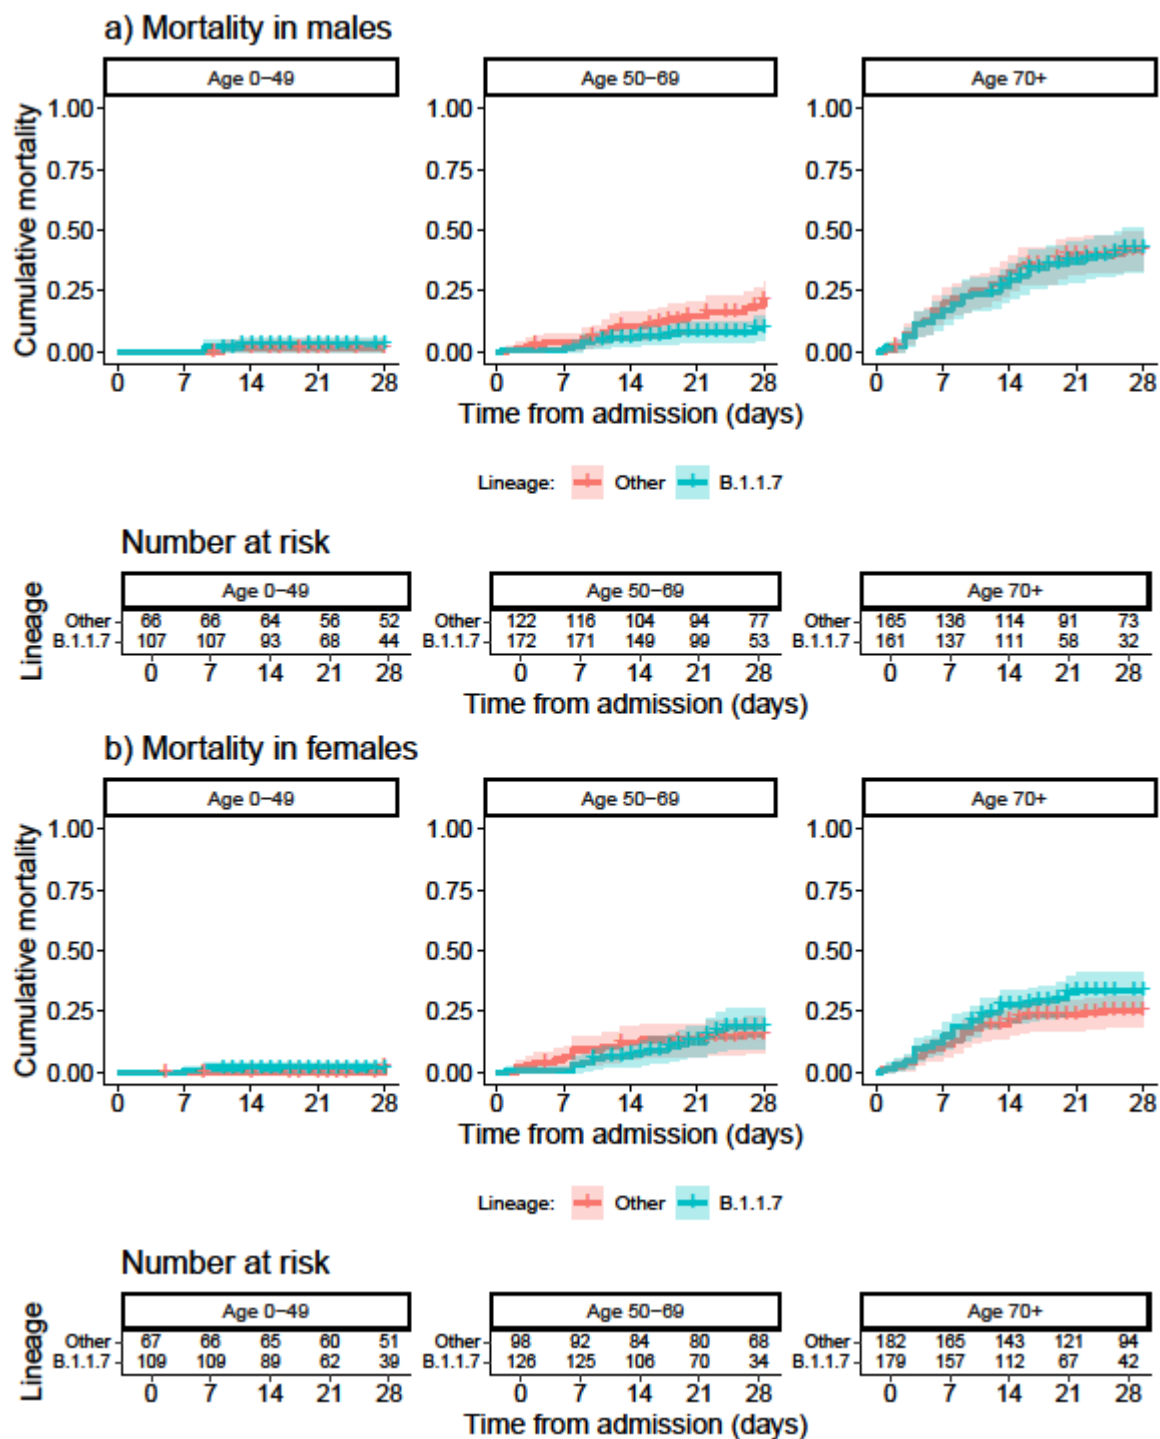



**Figure S4** Kaplan-Meier plots of all-cause mortality among all hospital-onset COVID-19 infection cases in relation to lineage B.1.1.7 status, plotted according to patient sex and age categories. Naïve 95% CIs are plotted for illustrative purposes (these are not derived from the multilevel Cox models described).

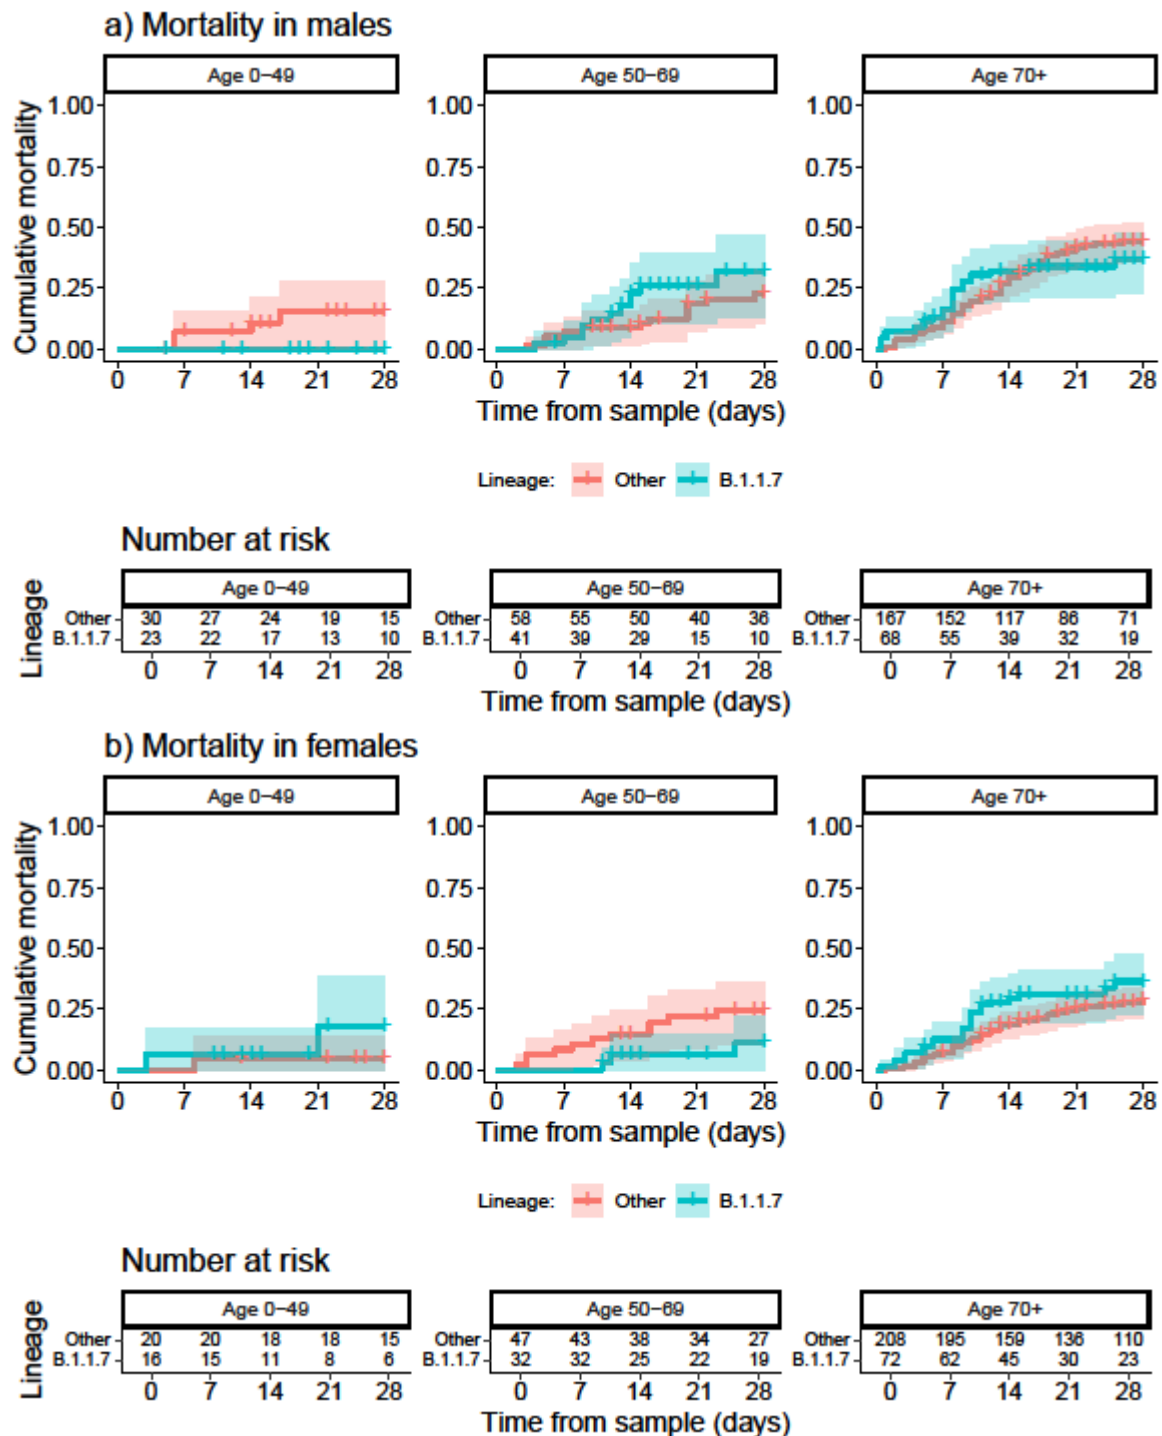

**Figure S5** Kaplan-Meier plots of intensive therapy unit (ITU) admission among all inpatients admitted with SARS-CoV-2 in relation to lineage B.1.1.7 status, plotted according to patient sex and age categories. Naïve 95% CIs are plotted for illustrative purposes (these are not derived from the multilevel Cox models described).

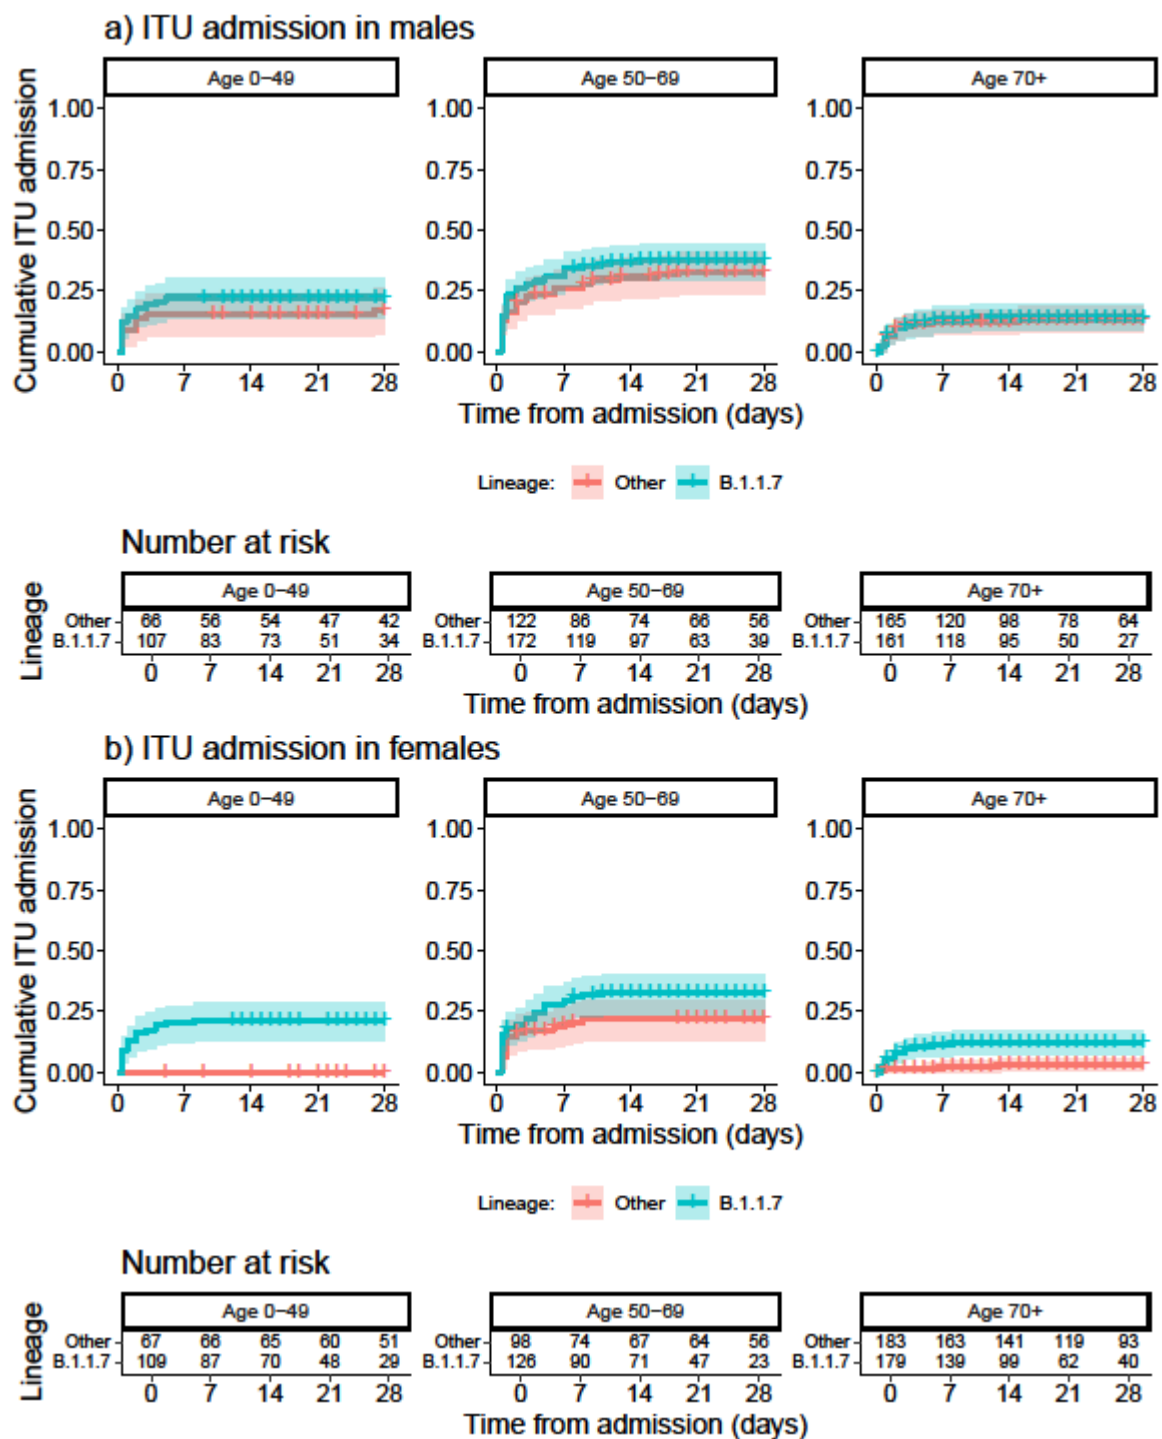

**Figure S6** Kaplan-Meier plots of intensive therapy unit (ITU) admission among all hospital-onset COVID-19 infection cases in relation to lineage B.1.1.7 status, plotted according to patient sex and age categories. Naïve 95% CIs are plotted for illustrative purposes (these are not derived from the multilevel Cox models described).

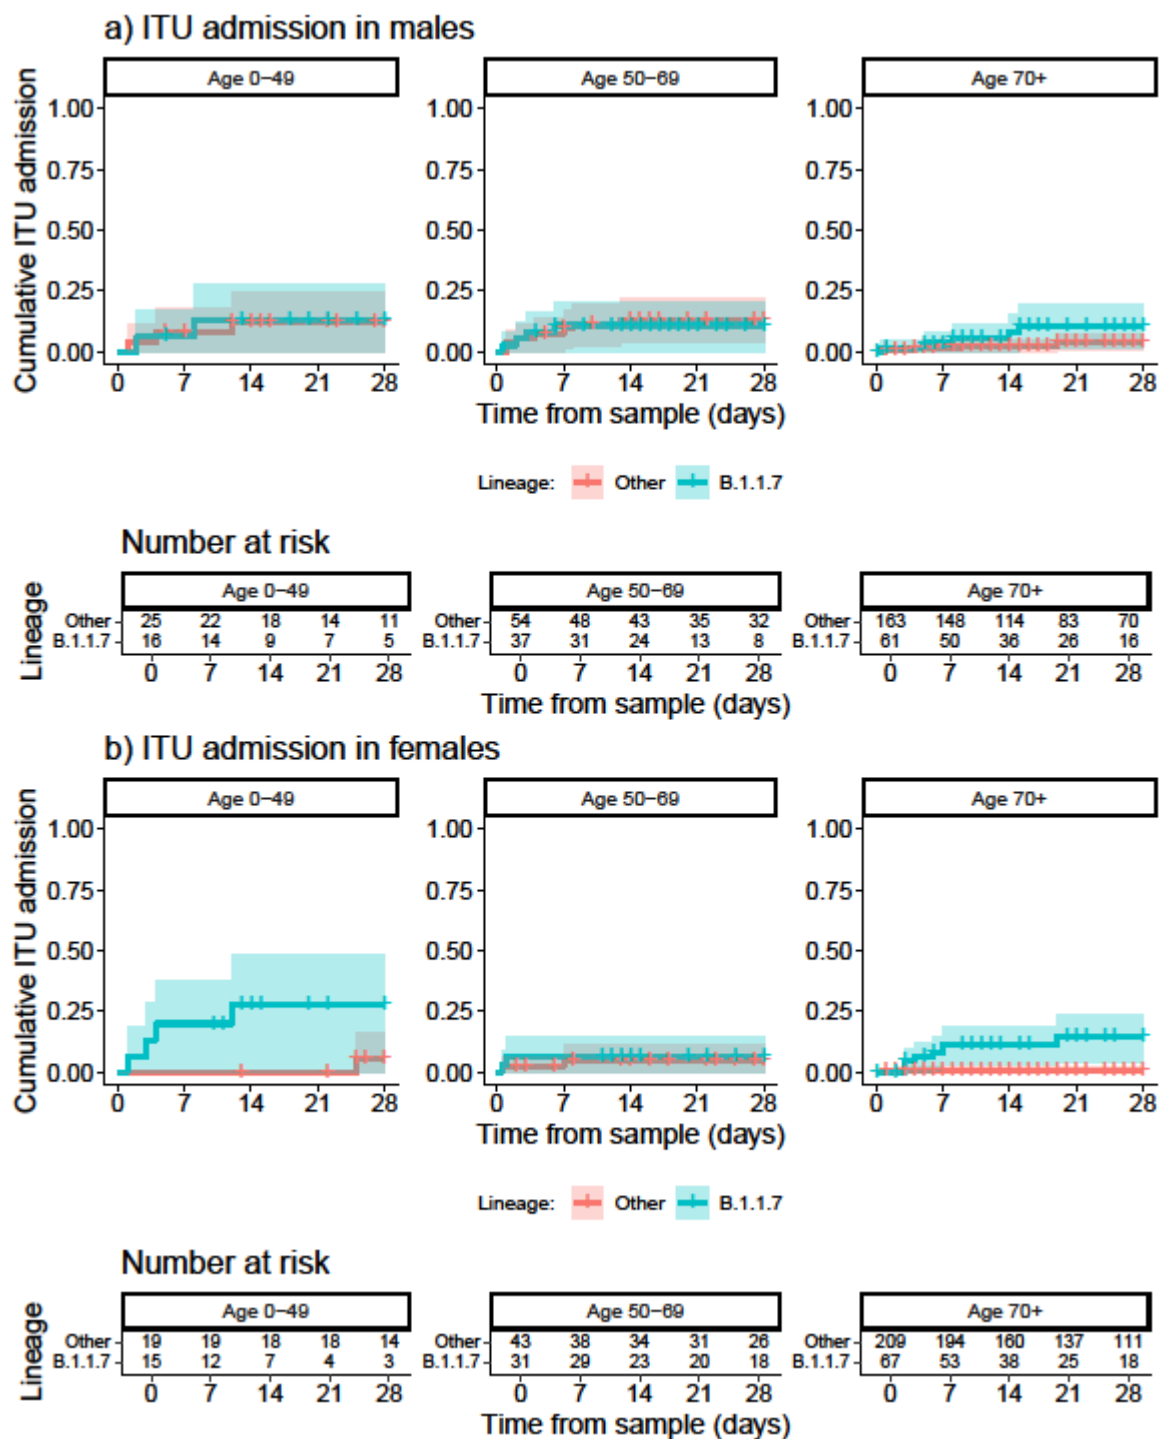

Supplement: Supplementary file [file media-1.pdf]
