# Supplementary material for: SARS-CoV-2 lineage B.1.1.7 is associated with greater disease severity among hospitalised women but not men
Source: bioRxiv or medRxiv preprint supplement (doi:10.1101/2021.06.24.21259107), 2021-06-28
Supplement: Supplementary file [file media-2.pdf]

## **Composition of the COG-UK HOCl Variant substudy consortium**

### **Data analysis and report writing**

\*Oliver Stirrup  
\*Florencia Tettamanti Boshier  
\*Cristina Venturini  
\*José Afonso Guerra-Assunção  
Nick Freemantle  
Andrew Copas  
Andrew Hayward  
Judith Breuer  
\*contributed equally

### **Study oversight and quality assurance**

#### **UCL Comprehensive Clinical Trials Unit**

James Blackstone  
Leanne Hockey  
Georgia Marley

### **Collection of samples, sequence data and meta-data**

#### **Barts Health Trust**

Teresa Cutino-Moguel  
Tabassum Khan  
Raghavendran Kulasegaran-Shylini  
Beatrix Kele  
David Harrington  
Anna Riddell

#### **MRC-University of Glasgow Centre for Virus Research (CVR)**

Emma Thomson  
Joseph Hughes  
Ana Filipe

#### **Queen Elizabeth University Hospital, NHS Greater Glasgow & Clyde (QEUH)**

Guy Mollett  
Christine Peters  
Emma Thomson

#### **Guy's and St Thomas' NHS Foundation Trust and Centre for Clinical Infection & Diagnostics Research, King's College London**

Gaia Nebbia  
Luke Blagdon Snell  
Flavia Flaviani  
Themoula Charalampous  
Adela Alcolea-Medina  
Bindi Patel  
Tom G S Williams  
Rahul Batra  
Jonathan D Edgeworth

**Imperial College Healthcare NHS Trust**

James R Price  
Alison H Holmes

**North West London Pathology**

Paul Randell  
Pinglawathee Madona  
Alison Cox

**Royal Free London NHS Foundation Trust**

Tabitha Mahungu  
Sophie Weller  
Jennifer Hart  
Tanzina Haque  
Dianne Irish

**UCL Pathogen Genomics Unit**

Judith Breuer  
Rachel Williams  
José Afonso Guerra-Assunção  
Juanita Pang  
Sunando Roy  
Charlotte Williams  
Helena Tutill  
Nadua Bayzid  
Marius Cotic

**University of Sheffield and Sheffield Teaching Hospitals NHS Foundation Trust**

Thushan de Silva

David Partridge  
Matthew Parker  
Luke Green  
Benjamin Lindsey  
Amy State  
Alison Cope  
Katie Johnson  
Adrienn Angyal  
Peijun Zhang  
Max Whiteley  
Marta Gallis Ramalho  
Stella Christou  
Stavroula Louka  
Hailey Hornsby  
Benjamin Foulkes  
Paige Wolverson  
Joe Heffer  
Nikki Smith

**University of Portsmouth**

Samuel Robson  
Angela Beckett  
Salman Goudarzi  
Chris Fearn  
Kate Cook  
Katie Loveson

**Portsmouth Hospitals University NHS Trust**

Sharon Glaysher  
Scott Elliott

**University Hospital Southampton NHS Foundation Trust**

Kordo Saeed  
Eleri Wilson-Davies  
Adhyana Mahamana  
Buddhini Samaraweera  
Siona Silveira  
Stephen Aplin  
Sarah Jeremiah  
Helen Umpleby

Helen Wheeler  
Matthew Harvey  
Thea Sass  
Jacqui Prieto  
Emanuela Pelosi

**St Georges University and Healthcare Trust**

Kenneth Laing  
Adam Witney  
Irene Monahan  
Ngee Keong Tan  
Joshua Taylor  
Cassie Pope  
Claudia Cardoso Pereira

**University College London Hospitals NHS foundation Trust  
UCLH Advanced Pathogen Diagnostics Unit**

Eleni Nastouli  
Catherine F Houlihan  
Dan Frampton  
Tommy Rampling  
Matt Byott  
Judith Heaney  
Gee Yen Shin  
Moiria Spyer  
Malin Bergstrom  
Emilie Sanchez  
Stavroula M Paraskevopoulou  
Marios Margaritis
